# Supplementary material for: Technical note: A procedure to clean, decompose, and aggregate time series
Source: Copernicus journal article supplement (doi:10.5194/hess-27-349-2023), 2023-01-18
Supplement: Supplementary file 1 [file hess-27-349-2023-supplement.pdf]

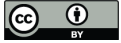

*Supplement of*

## **Technical note: A procedure to clean, decompose, and aggregate time series**

**François Ritter**

*Correspondence to:* François Ritter ([ritter.francois@gmail.com](mailto:ritter.francois@gmail.com))

The copyright of individual parts of the supplement might differ from the article licence.

## Part I: outliers

### 1) Determination of the $C$ value in $\alpha(n) = A \log(n) + B + C/n$

The value of  $C$  has been parametrized on the Pearson family for  $n = 9$  ( $m_*$  would break with a single outlier for  $n = 8$ ) so that the percentage of flagged outliers is equal to 0.1%, which corresponds to the order of magnitude of the theoretical threshold (from  $\sim 0.033\%$  to  $0.1\%$  for small samples)

The optimum value of  $C = 36$  has been determined with the following Monte-Carlo procedure: for a given  $C$ , the percentage of flagged outliers is estimated over 100 generations. Each generation is composed of 100 random distributions of the Pearson family, each distribution generates 1000 random samples of size  $n = 9$ . The total number of points per generation is therefore  $100 \times 1000 \times 9 = 9 \times 10^5$ .

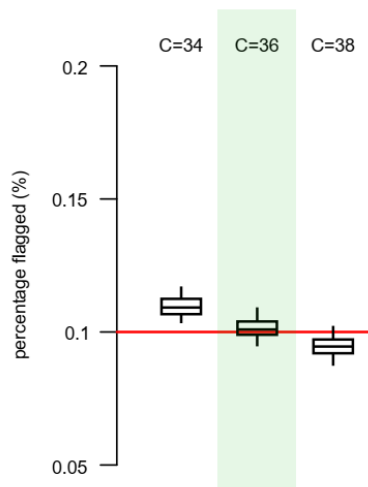

**Fig. S1.** Impact of the  $C$  value on the percentage of outliers flagged in small samples ( $n = 9$ ) with the Boxplot rule using  $\alpha = A \log(n) + B + \frac{C}{n}$  with  $A$  and  $B$  known. Each boxplot has been constructed on 100 generations of  $10^5$  random samples of size  $n = 9$  from the Pearson family.

## Part II: the ctbi procedure

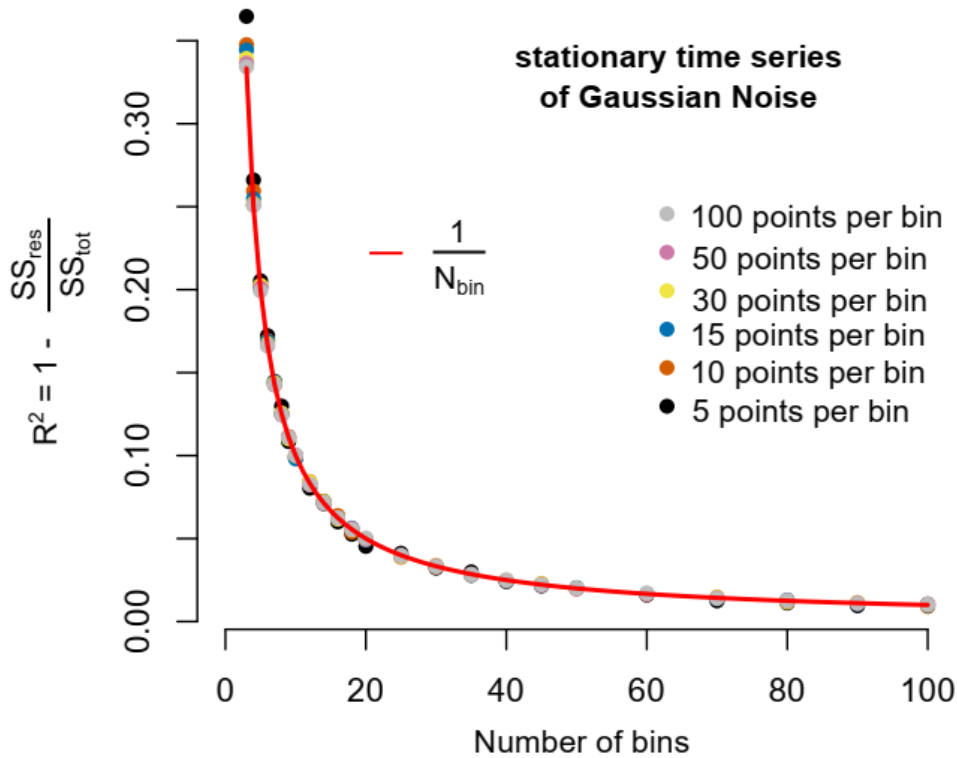

**Fig. S2.** The coefficient of determination ( $R^2 = 1 - \frac{SS_{res}}{SS_{tot}}$ ) has been calculated for multiple stationary time series of Gaussian noise  $y$ , with  $SS_{res} = \sum(y_i - S_i)^2$ ,  $SS_{tot} = \sum(y_i)^2$  and  $S$  the cyclic component calculated with the **ctbi** procedure.

### 1) Definition of the Stacked Cycles Index

Considering Fig. S2, an inverse relationship appears between the coefficient of determination calculated on a pure Gaussian noise and the number of bins used (related to the sample size). This relationship is independent from the number of points per bin (illustrated by different colors). Theoretically, a stationary timeseries has a null cyclicity ( $R^2 = 0$ ). While this is observed for a large number of bins ( $N_{bin} \gg 100$ ), a bias of  $N_{bin}^{-1}$  exists at a smaller amount and needs to be corrected. This justifies the definition of the stacked cycles index as  $SCI = R^2 - N_{bin}^{-1}$ .

### 2) The outlier level for the precipitation dataset

Because daily precipitation data follow a heavy-tailed distribution, it is difficult to determine an outlier level that seems “reasonable” for a 30-year time series. The outlier level is defined as  $y_{outlier} = \lambda y_{max}$  and the constant  $\lambda$  is determined using all century-old weather stations. The procedure is the following for a station  $i$ :

- (i) Compute  $(y_{max})_{100 \text{ years}}$ . An “impossible” event is defined as occurring above  $1.2 \times (y_{max})_{100 \text{ years}}$  (20% above the century maximum)
- (ii) Randomly select 30 continuous years, and compute  $(y_{max})_{30 \text{ years}}$
- (iii) Compute and store  $\lambda_i = 1.2 \frac{(y_{max})_{100 \text{ years}}}{(y_{max})_{30 \text{ years}}}$

The mean value for all stations is  $\lambda = 1.6 \pm 0.4$

### 3) Complex seasonality

Signals showing residuals with non-stationary variance need to be split into several parts of similar variance. This can be achieved using bins with similar MADs. This operation is illustrated on a soil respiration dataset (MIGLIAVACCA) from the COSORE database (Bond-Lamberty et al., 2020).

The MIGLIAVACCA dataset consists of 8 sensors (or “ports”) performing measurements of CO<sub>2</sub> flux from 2015 to 2020. Each port performs a measurement every 32 minutes, and there is a 4-minute gap between two successive ports. For each port, the following protocol is applied (Fig. S3):

- (i) Apply **ctbi** with the median every day (bin.period = ‘1 day’), do not flag outliers (*coeff.outlier* = NA) or impute data (*SCI<sub>min</sub>* = NA).
- (ii) Split the raw data into data.low (bins with low MAD) and data.high (bins with high MAD).
- (iii) Apply **ctbi** separately to data.low and data.high, and flag outliers (*coeff.outlier* = ‘auto’)
- (iv) Merge data.low and data.high
- (v) Repeat steps (i) to (iv) with bin.period = ‘1 month’

The comparison between *coeff.outlier* = ‘auto’ and *coeff.outlier* = NA is shown in Fig. S3.

While obvious periods of instrument failure are still present (in September 2017, August-October 2018 for port 4 or March 2019 for port 1), this procedure proves that most outliers are correctly flagged (all ports were treated independently) when compared to an aggregation without pre-processing (*coeff.outlier* = NA in Fig. S3).

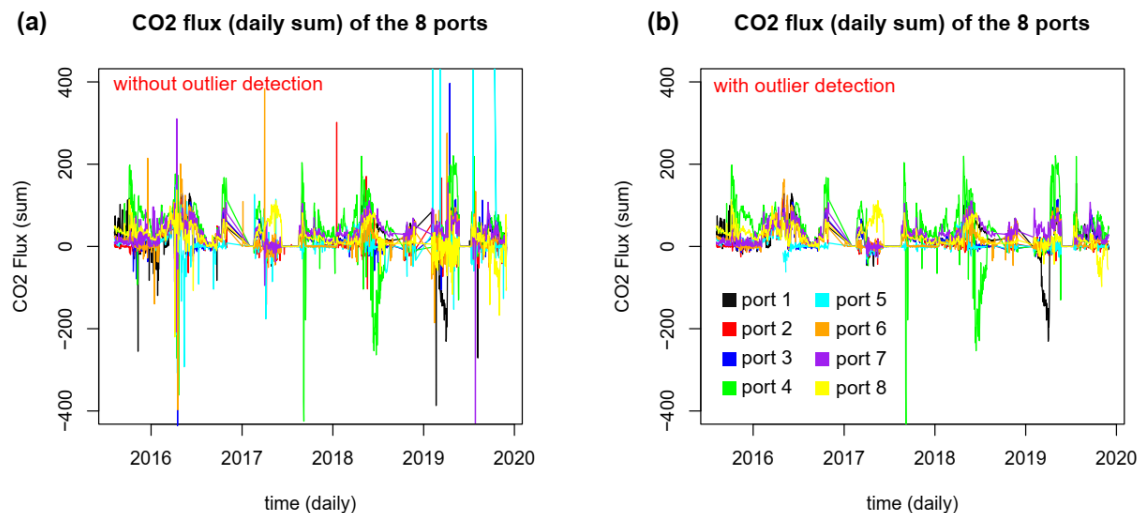

**Fig. S3.** Soil respiration (daily flux) for the MIGLIAVACCA dataset, with the value of *coeff.outlier* = NA (no outlier detection, panel a) and *coeff.outlier* = ‘auto’ (Logbox procedure, panel b).

### References

Bond-Lamberty, Ben, Danielle S. Christianson, Avni Malhotra, Stephanie C. Pennington, Debjani Sihi, Amir AghaKouchak, Hassan Anjileli et al. "COSORE: A community database for continuous soil respiration and other soil-atmosphere greenhouse gas flux data." *Global change biology* 26, no. 12 (2020): 7268-7283.
